# Supplementary material for: Preclinical research in Rett syndrome: setting the foundation for translational success
Source: PubMed Central journal article supplement — Dis Model Mech. 2012 Nov;5(6):733–45. doi: 10.1242/dmm.011007 (PMC3484856; doi:10.1242/dmm.011007), 2012-11
Supplement: supp_5.6.733_DMM011007_TableS2.pdf [file supp_5.6.733_DMM011007_TableS2.pdf]

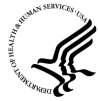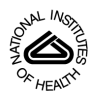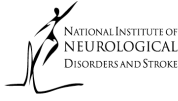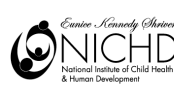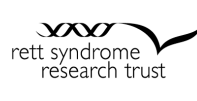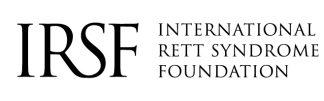

# Setting Priorities for Therapy Development in Rett Syndrome

**Bethesda Hyatt Hotel  
Bethesda, MD**

*September 25–27, 2011*

---

## Participant List

---

**Sarah Allan, Ph.D.**

Scientific Editor  
*Disease Models & Mechanisms*

**Stuart Apfel, M.D.**

President  
Parallax Clinical Research

**Janice Ascano, Ph.D.**

Manager of Grants and Research  
International Rett Syndrome Foundation

**Chris Austin, M.D.**

Scientific Director  
Center for Translational Therapeutics  
National Human Genome Research Institute  
National Institutes of Health

**Stephen Bajardi**

Executive Director  
International Rett Syndrome Foundation

**Yves-Alain Barde**

Professor  
University of Basel

**Joanne Berger-Sweeney, Ph.D., M.P.H.**

Dean of the School of Arts and Sciences  
Tufts University

**Mary Blue, Ph.D.**

Associate Professor  
Hugo W. Moser Research Institute at  
Kennedy Krieger

**Daniela Brunner, Ph.D.**

Senior Vice President  
Behavioral Research and Development  
PsychoGenics, Inc.

**Rita Cantor, Ph.D.**

Professor  
Departments of Human Genetics and  
Psychiatry  
University of California, Los Angeles

**Monica Coenraads, M.B.A.**

Executive Director  
Rett Syndrome Research Trust

**Jacqueline Crawley, Ph.D.**

Professor-in-Residence  
Department of Psychiatry and Behavioral  
Sciences  
UC Davis

**Sasha Djukic, M.D., Ph.D.**

Director  
Rett Syndrome Center  
Albert Einstein College of Medicine

**Daniel Ebert, M.D., Ph.D.**

Instructor  
Harvard Medical School

**James Eubanks, Ph.D.**

Senior Scientist  
Toronto Western Research Institute

**Robert Finkelstein, Ph.D.**

Director, Division of Extramural Research  
National Institute of Neurological Disorders  
and Stroke  
National Institutes of Health

**Kenneth (Kurt) Fischbeck, M.D.**

Branch Chief  
National Institute of Neurological Disorders  
and Stroke  
National Institutes of Health

**Lois M. Freed, Ph.D.**

Supervisory Pharmacologist  
Division of Neurology Products  
Center for Drug Evaluation and Research  
U.S. Food and Drug Administration

**Maurizio Giustetto, Ph.D.**

Department of Neuroscience and National  
Institute of Neuroscience-Italy  
University of Torino

**Jacky Guy, Ph.D.**

University of Edinburgh

**Jill Heemskerk, Ph.D.**

Program Director

Translational Research

National Institute of Neurological Disorders  
and Stroke

National Institutes of Health

**Peter Huppke, M.D.**

Georg August University Goettingen

**Monica Justice, Ph.D.**

Professor

Department of Molecular and Human  
Genetics

Baylor College of Medicine

**David Katz, Ph.D.**

Professor

Department of Neurosciences

Case Western School of Medicine

**Walter Kaufmann, M.D.**

Director

Center for Genetic Disorders of Cognition  
and Behavior

Kennedy Krieger Institute

**Ed Kaye, M.D.**

Chief Medical Officer and Senior Vice

President

Clinical Research

AVI BioPharma

**Jonathan Kipnis, Ph.D.**

Associate Professor

University of Virginia

**Francis Lee, M.D., Ph.D.**

Professor

Weill Cornell Medical College

**Frank Longo, M.D., Ph.D.**

Professor and Chairman

Department of Neurology

Stanford University

**Cathleen (Cat) Lutz, Ph.D.**

Associate Director

Genetic Resource Science

The Jackson Laboratory

**Laura Mamounas, Ph.D.**

Program Director, Neurogenetics Cluster

National Institute of Neurological Disorders  
and Stroke

National Institutes of Health

**Pat Manos, Ph.D.**

Scientific Review Officer

Center for Scientific Review

National Institutes of Health

**John McCall, Ph.D.**

President

PharMac LLC

**Elizabeth McNeil, M.D., M.Sc.**

Medical Officer

National Institute of Neurological Disorders  
and Stroke

National Institutes of Health

**Jill Morris**

Program Director

National Institute of Neurological Disorders  
and Stroke

National Institutes of Health

**Vinodh Narayanan, M.D.**

Child Neurologist

Barrow Neurological Institute

**Jeff Neul, M.D., Ph.D.**

Associate Professor

Duncan Neurological Research Institute

Baylor College of Medicine

**MaryLou Oster-Granite, Ph.D.**

Health Scientist Administrator

Intellectual and Developmental Disabilities  
Branch

Center for Developmental Biology and  
Perinatal Medicine

Eunice Kennedy Shriver National Institute  
of Child Health and Human Development

National Institutes of Health

**Robert Pacifici, Ph.D.**

Chief Scientific Officer

CHDI Foundation, Inc.

**David Panchision, Ph.D.**

Chief

Developmental Neurobiology Program

National Institute of Mental Health

National Institutes of Health

**Anne Pariser, M.D.**

Associate Director for Rare Diseases

Center for Drug Evaluation and Research

Office of New Drugs

U.S. Food and Drug Administration

**Melissa Parisi, M.D., Ph.D.**

Branch Chief  
Intellectual and Developmental Disabilities  
Branch  
Eunice Kennedy Shriver National Institute  
of Child Health and Human Development  
National Institutes of Health

**Alan Percy, M.D.**

Associate Director  
Civitan International Research Center

**Andrew Pieper, M.D., Ph.D.**

Assistant Professor  
Department of Psychiatry and Biochemistry  
University of Texas Southwestern Medical  
Center

**Lucas Pozzo-Miller, Ph.D.**

Professor  
Department of Neurobiology  
University of Alabama at Birmingham

**Jan-Marino (Nino) Ramirez, Ph.D.**

Director  
Center for Integrative Brain Research  
Seattle Children's Research Institute

**Rodney Samaco, Ph.D.**

Postdoctoral Fellow  
Duncan Neurological Research Institute  
Baylor College of Medicine

**Laura Schaevitz, Ph.D.**

Department of Biology  
Tufts University

**Shlomo Shinnar, M.D., Ph.D.**

Professor  
Epilepsy Management Center  
Montefiore Medical Center  
Albert Einstein College of Medicine

**Vivian Siegel, Ph.D.**

Editor in Chief, *Disease Models &  
Mechanisms*  
Director of Scientific Education and Public  
Communications  
The Broad Institute of MIT and Harvard

**Shai Silberberg, Ph.D.**

Program Director  
National Institute of Neurological Disorders  
and Stroke  
National Institutes of Health

**Coryse St. Hillaire-Clarke, Ph.D.**

Program Analyst  
Extramural Research Program  
National Institute of Neurological Disorders  
and Stroke  
National Institutes of Health

**Mriganka Sur, Ph.D.**

Head, Department of Brain and Cognitive  
Sciences  
Massachusetts Institute of Technology

**Edmund M. Tally, Ph.D.**

National Institute of Neurological Disorders  
and Stroke  
National Institutes of Health

**Juan Young, Ph.D.**

Assistant Professor  
Hussman Institute for Human Genomics

**Ran Zhang, Ph.D.**

Program Analyst  
National Institute of Neurological Disorders  
and Stroke  
National Institutes of Health

**Zhaolan (Joe) Zhou, Ph.D.**

Assistant Professor  
Department of Genetics  
University of Pennsylvania

**Huda Zoghbi, M.D.**

Director  
Duncan Neurological Research Institute  
Baylor College of Medicine
